1 **Whole genome analysis illustrates global clonal population structure of the**  
2 **ubiquitous dermatophyte pathogen *Trichophyton rubrum***

3  
4 Gabriela F. Persinoti<sup>\*,§§§§</sup>, Diego A. Martinez<sup>†,§§§§,1</sup>, Wenjun Li<sup>‡,§§§§,2</sup>, Aylin Döğen<sup>†,§</sup>, R.  
5 Blake Billmyre<sup>‡,3</sup>, Anna Averette<sup>‡</sup>, Jonathan M. Goldberg<sup>†,4</sup>, Terrance Shea<sup>†</sup>, Sarah  
6 Young<sup>†</sup>, Qiandong Zeng<sup>†,5</sup>, Brian G. Oliver<sup>\*\*</sup>, Richard Barton<sup>††</sup>, Banu Metin<sup>‡‡</sup>, Süleyha  
7 Hilmioglu-Polat<sup>§§</sup>, Macit Ilkit<sup>\*\*\*</sup>, Yvonne Gräser<sup>†††</sup>, Nilce M. Martinez-Rossi<sup>\*</sup>, Theodore C.  
8 White<sup>†††</sup>, Joseph Heitman<sup>‡,\*\*\*\*</sup>, Christina A. Cuomo<sup>†,\*\*\*\*</sup>

9  
10 <sup>\*</sup>Department of Genetics, Ribeirão Preto Medical School, University of São Paulo, Brazil

11 <sup>†</sup>Broad Institute of MIT and Harvard, Cambridge, Massachusetts 02142, USA

12 <sup>‡</sup>Department of Molecular Genetics and Microbiology, Duke University Medical Center, Durham,  
13 North Carolina, USA

14 <sup>§</sup>Department of Pharmaceutical Microbiology, Faculty of Pharmacy, University of Mersin,  
15 Mersin, Turkey

16 <sup>\*\*</sup>Center for Infectious Disease Research, Seattle, Washington, USA

17 <sup>††</sup>University of Leeds, Leeds, United Kingdom

18 <sup>‡‡</sup>Department of Food Engineering, Faculty of Engineering and Natural Sciences, Istanbul  
19 Sabahattin Zaim University, Istanbul, Turkey

20 <sup>§§</sup>Department of Microbiology, Faculty of Medicine, University of Ege, Izmir, Turkey

21 <sup>\*\*\*</sup>Division of Mycology, Department of Microbiology, Faculty of Medicine University of  
22 Çukurova, Adana, Turkey

23 <sup>†††</sup>Institute of Microbiology and Hygiene, University Medicine Berlin - Charité, Berlin, Germany

24 <sup>‡‡‡</sup>School of Biological Sciences, University of Missouri-Kansas City, Kansas City, Missouri,  
25 USA

26 <sup>§§§§</sup>equal contribution as first authors. <sup>\*\*\*\*</sup>corresponding authors.

27 Current addresses: <sup>1</sup>Veritas Genetics, Danvers, Massachusetts 01923, USA; <sup>2</sup>National Center  
28 for Biotechnology Information (NCBI), 8600 Rockville Pike, Bethesda, MD 20894, USA;

29 <sup>3</sup>Stowers Institute for Medical Research, Kansas City, Missouri, USA; <sup>4</sup>Harvard T. H. Chan  
30 School of Public Health, Boston, Massachusetts 02115, USA; <sup>5</sup>LabCorp, Westborough, MA  
31 01581, USA.

32

33 Data access: Genome sequence data is available in NCBI under the Umbrella BioProject  
34 PRJNA186851.

35

36 **Running title:** Global clonal population structure of *Trichophyton rubrum*

37

38 **Keywords:** *Trichophyton rubrum*, *Trichophyton interdigitale*, dermatophyte, genome  
39 sequence, MLST, mating, recombination, LysM

40

41 **Corresponding authors:**

42 Christina A. Cuomo, Broad Institute, 415 Main Street, Cambridge, MA 02142. Phone:  
43 (617) 714-7904. Email: [cuomo@broadinstitute.org](mailto:cuomo@broadinstitute.org)

44

45 Joseph Heitman, 322 CARL Building, Box 3546, Duke University Medical Center,  
46 Durham, N.C. 27710. Phone: (919) 684-2824. Email: [heitm001@duke.edu](mailto:heitm001@duke.edu)

## 47 **Abstract**

48 Dermatophytes include fungal species that infect humans, as well as those which also  
49 infect other animals or only grow in the environment. The dermatophyte species  
50 *Trichophyton rubrum* is a frequent cause of skin infection in immunocompetent  
51 individuals. While members of the *T. rubrum* species complex have been further  
52 categorized based on various morphologies, the population structure and ability to  
53 undergo sexual reproduction are not well understood. In this study, we analyze a large  
54 set of *T. rubrum* and *Trichophyton interdigitale* isolates to examine mating types,  
55 evidence of mating, and genetic variation. We find that nearly all isolates of *T. rubrum*  
56 are of a single mating type, and that incubation with *T. rubrum* morphotype *megrinii*  
57 isolates of the other mating type failed to induce sexual development. While the region  
58 around the mating type locus is characterized by a higher frequency of SNPs compared  
59 to other genomic regions, we find that the population is remarkably clonal, with highly  
60 conserved gene content, low levels of variation, and little evidence of recombination. These  
61 results support a model of recent transition to asexual growth when this species  
62 specialized to growth on human hosts.

63

## 64 **Introduction**

65 Dermatophyte species are the most common fungal species causing skin infections. Of  
66 the more than 40 different species infecting humans, *Trichophyton rubrum*, the major  
67 cause of athlete's foot, is the most frequently observed [1,2]. Other species are more  
68 often found on other skin sites, such as those found on the head, including *Trichophyton*  
69 *tonsurans* and *Microsporum canis*. Some dermatophyte species only cause human  
70 infections, including *T. rubrum*, *T. tonsurans*, and *T. interdigitale*. Other species,  
71 including *Trichophyton benhamiae*, *Trichophyton equinum*, *Trichophyton verrucosum*,  
72 and *M. canis*, infect mainly animals and occasionally humans, while others such as  
73 *Microsporum gypseum* (*Nannizzia gypsea* [3]) are commonly found in soil and rarely  
74 infect animals. In addition to the genera *Trichophyton* and *Microsporum*,  
75 *Epidermophyton* and *Nannizzia* are other genera of dermatophytes that commonly  
76 cause infections in humans [4]. The species within these genera are closely related

77 phylogenetically and are within the Ascomycete order Onygenales, family  
78 Arthrodermataceae [3,5].

79

80 The *Trichophyton rubrum* species complex includes several “morphotypes,” many of  
81 which rarely cause disease, and *T. violaceum*, a species that causes scalp infections  
82 [3,6]. Some morphotypes display phenotypic variation, though these differences can be  
83 modest. For example, *T. rubrum* morphotype *raubitscheckii* differs from *T. rubrum* in  
84 production of urease and in colony pigmentation and colony appearance under some  
85 conditions [7]. *T. rubrum* morphotype *megninii*, which is commonly isolated in  
86 Mediterranean countries, requires L-histidine for growth unlike other *T. rubrum* isolates  
87 [6]. However, little variation has been observed between these and other morphotypes  
88 in the sequence of individual loci, such as the ITS rDNA locus; additionally, some of the  
89 morphotypes do not appear to be monophyletic [3,6,8], complicating any simple  
90 designation of all types as separate species. Combining morphological and multilocus  
91 sequence typing (MLST) data has helped clarify relationships of the major genera of  
92 dermatophytes and resolved polyphyletic genera initially assigned by morphological or  
93 phenotypic data.

94

95 Mating has been observed in some dermatophyte species, although not to date in strict  
96 anthropophiles including *T. rubrum* [9]. Mating type in dermatophytes, as in other  
97 Ascomycetes, is specified by the presence of one of two idiomorphs at a single mating  
98 type (*MAT*) locus; each idiomorph includes either an alpha box domain or HMG domain  
99 transcription factor gene [10]. In the geophilic species *M. gypseum*, isolates of opposite  
100 mating type (*MAT1-1* and *MAT1-2*) undergo mating and produce recombinant progeny  
101 [10]. In the zoophilic species *T. benhamiae*, both mating types are detected in the  
102 population and mating assays produced fertile cleistothecia [11], structures that contain  
103 meiotic ascospores. In a study examining 600 isolates of *T. rubrum*, only five appeared  
104 to produce structures similar to cleistothecia [12], suggesting inefficient development of  
105 the spores required for mating. Sexual reproduction experiments of *T. rubrum* with  
106 tester strains of *Trichophyton simii*, a skin infecting species that is closely related to *T.*  
107 *mentagrophytes*, have been reported and one recombinant isolate was characterized,

108 consistent with a low frequency of mating of *T. rubrum* [13]. Further, sexual reproduction  
109 of *T. rubrum* may be rare in natural populations, as a single mating type (*MAT1-1*) has  
110 been noted in Japanese isolates [14], matching that described in the *T. rubrum*  
111 reference genome of CBS 118892 [10].

112  
113 Here we describe genome-wide patterns of variation in *T. rubrum*, revealing a largely  
114 clonal population. This builds on prior work to produce reference genomes for *T. rubrum*  
115 [15] and other dermatophytes [15,16]. Genomic analysis of two divergent morphotypes  
116 of *T. rubrum*, *megrinii* and *soudanense*, reveal hotspots of variation linked to the mating  
117 type locus suggestive of recent recombination. While nearly all *T. rubrum* isolates are of  
118 a single mating type (*MAT1-1*), the sequenced *megrinii* morphotype isolate contains a  
119 *MAT1-2* locus, suggesting the capacity for infrequent mating in the population.  
120 Additionally, we examine variation in gene content across dermatophyte genomes  
121 including the first representatives of *T. interdigitale*.

122

## 123 **Materials and methods**

### 124 **Isolate selection, growth conditions, and DNA isolation**

125 Isolates analyzed are listed in **Table S1**, including the geographic origin, site of origin,  
126 and mating type for each. Isolates selected for whole genome sequencing were chosen  
127 to maximize diversity by covering the main known groups. For whole genome  
128 sequencing, 10 *T. rubrum* isolates and 2 *T. interdigitale* isolates were selected,  
129 including representatives of the major morphotypes of *T. rubrum* (**Table S2**). Growth  
130 and DNA isolation for whole genome sequencing were performed as previously  
131 described [15].

132

133 For MLST analysis, a total of 80 *T. rubrum* isolates and 11 *T. interdigitale* isolates were  
134 selected for targeted sequencing. Isolates were first grown on PDA medium (Difco) for  
135 10 days at 25°C. Genomic DNA was extracted using an Epicentre Masterpure Yeast  
136 DNA purification kit (catalog number MPY08200). Fungal isolates were harvested from  
137 solid medium using sterile cotton swabs, transferred to microcentrifuge tubes, and  
138 washed with sterile PBS. Glass beads (2 mm) and 300 µL yeast cell lysis solution

139 (Epicentre) were added to the tube to break down fungal cells, and the protocol  
140 provided by Epicentre was then followed. The contents of the tube were mixed by  
141 vortexing and incubated at 65°C for 30 minutes, followed by addition of 150 µl Epicentre  
142 MPC Protein Precipitation Solution. After vortexing, the mixture was centrifuged for 10  
143 minutes, followed by isopropanol precipitation and washing with 70% ethanol. The DNA  
144 pellet was dissolved in TE buffer.

145  
146 For mating assays, we investigated 55 *T. rubrum* and 9 *T. interdigitale* isolates  
147 recovered from Adana and Izmir, Turkey. *T. simii* isolates CBS 417.65 MT -, CBS  
148 448.65 MT + and morphotype *megninii* isolates CBS 389.58, CBS 384.64, and CBS  
149 417.52 were also used in mating assays. DNA extraction was performed according to  
150 the protocol described by Turin et al. [17]. These isolates were typed by ITS sequence  
151 analysis. rDNA sequences spanning the internal transcribed spacer (ITS) 1 region were  
152 PCR-amplified using the universal fungal primers ITS1 (5'-  
153 TCCGTAGGTGAACCTGCGG3') and ITS4 (5'-CCTCCGCTTATTGATATGC-3') and  
154 sequenced on an ABI PRISM 3130XL genetic analyzer at Refgen Biotechnologies using  
155 the same primers (Ankara, Turkey). CAP contig assembly software, included in the  
156 BioEdit Sequence Alignment Editor 7.0.9.0 software package, was used to edit the  
157 sequences [18]. Assembled DNA sequences were characterized using BLAST in  
158 GenBank.

159

### 160 **Multilocus sequence typing (MLST)**

161 A total of 108 isolates were subjected to MLST analysis (**Table S3**). For each isolate,  
162 three loci (the *TruMDR1* ABC transporter [19], an intergenic region (IR), and an alpha-  
163 1,3-mannosyltransferase (CAP59 protein domain)), with high sequence diversity  
164 between *T. rubrum* CBS 118892 (GenBank accession: NZ\_ACPH000000000) and *T.*  
165 *tonsurans* CBS 112818 (GenBank accession: ACPI000000000), were selected as  
166 molecular markers in MLST. The following conditions were used in the PCR  
167 amplification of the three loci: an initial 2 min of denaturation at 98°C, followed by 35  
168 cycles of denaturation for 10 sec at 98°C, an annealing time of 15 sec at 54°C, and an  
169 extension cycle for 1 min at 72°C. The amplification was completed with an extension

170 period of 5 min at 72°C. PCR amplicons were sequenced using the same PCR primers  
171 on an ABI PRISM 3130XL genetic analyzer by Genewiz, Inc. (**Table S4**).  
172 Electropherograms of Sanger sequencing were examined and assembled using  
173 Sequencher 4.8 (Gene Codes). Alternatively, sequences were obtained from genome  
174 assemblies (**Table S5**).

175  
176 To confirm the species typing for four isolates (MR857, MR827, MR816, and MR897),  
177 the ITS1, 5.8S, and ITS2 region was amplified using the ITS5 (5'-  
178 GAAGTAAAAGTCGTAACAAGG-3') and Mas266 (5'-  
179 GCATTCCCAAACAACACTCGACTC-3') primers with initial denaturation at 94°C for 4  
180 minutes, 35 cycles of denaturation at 94°C for 30 seconds, annealing at 60°C for 30  
181 seconds, extension at 72°C for 1 minute, and final extension at 72°C for 10 minutes.  
182 The reactions were carried out using a BioRad C1000 Touch thermocycler. ABI  
183 sequencing reads were compared to the dermatophyte database of the Westerdijk  
184 Fungal Biodiversity Institute. The sequences of MR857 and MR827 isolates were 99.6%  
185 identical to that of the isolate RV 30000 of the African race of *T. benhamiae* (GenBank  
186 AF170456).

### 187 188 **Mating type determination**

189 To identify the mating type of each isolate, primers were designed to amplify either the  
190 alpha or HMG domain of *T. rubrum* (**Table S6**). For most isolates, PCR amplification  
191 was performed using an Eppendorf epGradient Mastercycler, and reactions were  
192 carried out using the following conditions for amplification: initial denaturation at 94°C  
193 for 4 minutes, 35 cycles of denaturation at 94°C for 30 seconds, annealing at 55°C for  
194 30 seconds, extension at 72°C for 1 minute, with a final extension at 72°C for 7 minutes.  
195 For isolates from Turkey, PCR amplifications were performed with the same primers  
196 using a Biorad C1000 Touch™ Thermal Cycler, and slightly modified conditions were  
197 used for amplification: initial denaturation at 94°C for 5 minutes, 35 cycles of  
198 denaturation at 95°C for 45 seconds, annealing at 55°C for 1.5 minutes, and extension  
199 at 72°C for 1 minute, and final extension at 72°C for 10 minutes. The presence of the  
200 alpha box gene, which is indicative of the *MAT1-1* mating type, or the HMG domain,



201 which is indicative of the *MAT1-2* mating type, was identified using primers  
202 JOHE21771/WL and JOHE21772/WL, creating a 500-bp product, and JOHE21773/WL  
203 and JOHE21774/WL, creating a 673-bp product, respectively. *Trichophyton rubrum* MR  
204 851 was used as a positive control for *MAT1-1*, and morphotype *megninii* CBS 389.58,  
205 CBS 384.64, CBS 417.52, and *T. interdigitale* MR 8801 were used as positive controls  
206 for *MAT1-2*. The mating type was assigned based on the presence or absence of PCR  
207 products on 1.5% agarose gels. For the whole genome sequenced isolates, mating type  
208 was determined by analysis of assembled and annotated genes.

209

### 210 **Mating assays**

211 Mating assays were performed using both Medium E (12 g/L oatmeal agar (Difco), 1 g/L  
212 MgSO<sub>4</sub>·7H<sub>2</sub>O, 1 g/L NaOH<sub>3</sub>, 1g/L KH<sub>2</sub>PO<sub>4</sub>, and 16 g/L agar [20]) and Takashio medium  
213 (1/10 Sabouraud containing 0.1% neopeptone, 0.2% dextrose, 0.1% MgSO<sub>4</sub>·7H<sub>2</sub>O, and  
214 0.1%. KH<sub>2</sub>PO<sub>4</sub>). *MAT1-1* and *MAT1-2* isolates grown on Sabouraud Dextrose Agar  
215 (SDA) for one week were used to inoculate both Medium E and Takashio medium  
216 plates pairwise 1 cm apart from each other. The plates were incubated at room  
217 temperature without Parafilm in the dark for 4 weeks. The petri dishes were examined  
218 under light microscopy for sexual structures.

219

### 220 **Genome sequencing, assembly, and annotation**

221 For genome sequencing, we constructed a 180-base fragment library from each  
222 sample, by shearing 100 ng of genomic DNA to a median size of ~250 bp using a  
223 Covaris LE instrument and preparing the resulting fragments for sequencing as  
224 previously described [21]. Each library was sequenced each on the Illumina HiSeq 2000  
225 platform. Roughly 100X of 101 base-paired Illumina reads were assembled using  
226 ALLPATHS-LG [22] run with assisting mode utilizing *T. rubrum* CBS118892 as a  
227 reference. For most genomes, assisting mode 2 was used (ASSISTED\_PATCHING=2)  
228 with version R42874; for *T. interdigitale* H6 and *T. rubrum* MR1463 version R44224 was  
229 used. For *T. rubrum* morphotype *megninii* CBS 735.88 and *T. rubrum* morphotype  
230 *raubitschekii* CBS 202.88 mode 2.1 was used (ASSISTED\_PATCHING=2.1) with  
231 version R47300. Assemblies were evaluated using GAEMR



232 (<http://software.broadinstitute.org/software/gaemr/>); contigs corresponding to the  
233 mitochondrial genome or contaminating sequence from other species were removed  
234 from assemblies.

235  
236 The *Trichophyton* assemblies were annotated using a combination of expression data,  
237 conservation information, and *ab-initio* gene finding methods as previously described  
238 [23]. Expression data included Illumina reads (SRX123796) from one RNA-Seq study  
239 [24] and all EST data available in GenBank as of 2012. RNA-Seq reads were  
240 assembled into transcripts using Trinity [25]. PASA [26] was used to align the  
241 assembled transcripts and ESTs to the genome and identify open reading frames  
242 (ORFs); gene structures were also updated in the previously annotated *T. rubrum*  
243 CBS118892 assembly [15]. Conserved loci were identified by comparing the genome  
244 with the UniRef90 database [27] (updated in 2012) using BLAST [28]. The BLAST  
245 alignments were used to generate gene models using Genewise [29]. The *T. rubrum*  
246 CBS 118892 genome was aligned with the new genomes using NUCmer [30]. These  
247 alignments were used to map gene models from *T. rubrum* to conserved loci in the new  
248 genomes.

249  
250 To predict gene structures, GeneMark, which is self-training, was applied first;  
251 GeneMark models matching GeneWise ORF predictions were used to train the other  
252 *ab-initio* programs. *Ab-initio* gene-finding methods included GeneMark [31], Augustus  
253 [32], SNAP [33] and Glimmer [34]. Next, EVM [35] was used to select the optimal gene  
254 model at each locus. The input for EVM included aligned transcripts from Trinity and  
255 ESTs, gene models created by PASA and GeneWise, mapped gene models, and *ab-*  
256 *initio* predictions. Rarely, EVM failed to produce a gene model at a locus likely to  
257 encode a gene. If alternative gene models existed at such loci, they were added to the  
258 gene set if they encoded proteins longer than 100 amino acids, or if the gene model  
259 was validated by the presence of a PFAM domain or expression evidence. Finally,  
260 PASA was run again to improve gene-model structure, predict splice variants, and add  
261 UTR.

262

263 Gene model predictions in repetitive elements were identified and removed from gene  
264 sets if they overlapped TPSI predictions (<http://transposonpsi.sourceforge.net>),  
265 contained PFAM domains known to occur in repetitive elements, or had BLAST hits  
266 against the Repbase database [36]. Additional repeats were identified using a BLAT  
267 [37] self-alignment of the gene set to the genomic sequence (requiring at least 90%  
268 nucleotide identity over 100 bases aligned); genes that hit the genome more than eight  
269 times using these criteria were removed. Genes with PFAM domains not found in  
270 repetitive elements were retained in the gene set, even if they met the above criteria for  
271 removing likely repetitive elements from the gene set.

272  
273 Lastly, the gene set was inspected to address systematic errors. Gene models were  
274 corrected if they contained in-frame stop codons, had coding sequence overlaps with  
275 coding regions of other gene models or predicted transfer or ribosomal RNAs, contained  
276 exons spanning sequence gaps, had incomplete codons, or with UTRs overlapping the  
277 coding sequences of other genes. Transfer RNAs were predicted using tRNAscan [38],  
278 and ribosomal RNAs were predicted with RNAmmer [39].

279  
280 All annotated assemblies and raw sequence reads are available in NCBI (**Table S5**).

281

## 282 **SNP identification and classification**

283 To identify SNPs within the *T. rubrum* group, Illumina reads for each *T. rubrum* isolate  
284 were aligned to the *T. rubrum* CBS 118829 reference assembly using BWA-MEM [40];  
285 reads from the H6 *T. interdigitale* were also aligned to the *T. interdigitale* MR 816  
286 assembly. The Picard tools (<http://picard.sourceforge.net>) AddOrReplaceReadGroups,  
287 MarkDuplicates, CreateSequenceDictionary, and ReorderSam were used to preprocess  
288 read alignments. To minimize false positive SNP calls near insertion/deletion (indel)  
289 events, poorly aligned regions were identified and realigned using GATK  
290 RealignerTargetCreator and IndelRealigner (GATK version 2.7-4 [41]). SNPs were  
291 identified using the GATK UnifiedGenotyper (with the haploid genotype likelihood  
292 model) run with the SNP genotype likelihood models (GLM). We also ran  
293 BaseRecalibrator and PrintReads for base quality score recalibration on sites called

294 using GLM SNP and re-called variants with UnifiedGenotyper emitting all sites.  
295 VCFtools [42] was used to count SNP frequency in windows across the genome (--  
296 SNPdensity 5000) and to measure nucleotide diversity (--site-pi), which was normalized  
297 for the assembly size. For comparison, the nucleotide diversity was calculated for the  
298 SNPs identified in a set of 159 isolates of *C. neoformans* var. *grubii*, a fungal pathogen  
299 that undergoes frequent recombination [43].

300  
301 SNPs were mapped to genes using VCFannotator (<http://vcfannotator.sourceforge.net/>),  
302 which annotates whether a SNP results in synonymous or non-synonymous change in  
303 coding region. The total number of synonymous and non-synonymous sites across the  
304 *T. rubrum* CBS 118829 and *T. interdigitale* MR 816 gene sets were calculated across all  
305 coding regions using codeml in PAML (version 4.8) [44]; these totals were used to  
306 normalize the ratios of non-synonymous to synonymous SNPs.

307  
308 **Copy number variation**  
309 To identify regions of *T. rubrum* that exhibit copy number variation between the isolates,  
310 we identified windows showing significant variation in normalized read depth using  
311 CNVnator [45]. The realigned read files used for SNP calling were input to CNVnator  
312 version 0.2.5, specifying a window size of 1kb. Regions reported as deletions or  
313 duplications were filtered requiring  $p\text{-val}1 < 0.01$ .

314  
315 **Phylogenetic and comparative genomic analysis**  
316 To infer the phylogenetic relationship of the sequenced isolates, we identified single  
317 copy genes present in all genomes using OrthoMCL [46]. Individual orthologs were  
318 aligned with MUSCLE [47] and then the alignments were concatenated and input to  
319 RAxML [48], version 7.3.3 with 1,000 bootstrap replicates and model GTRCAT. RAxML  
320 version 7.7.8 was used for phylogenetic analysis of SNP variant in seven *T. rubrum*  
321 isolates, with the same GTRCAT model.

322  
323 For each gene set, HMMER3 [49] was used to identify PFAM domains using release 27  
324 [50]; significant differences in gene counts for each domain were identified using

325 Fisher's exact test, with p-values corrected for multiple testing [51]. Proteins with LysM  
326 domains were identified using a revised HMM as previously described [15]; this HMM  
327 includes conserved features of fungal LysM domains including conserved cysteine  
328 residues not represented in the PFAM HMM model and identified additional genes with  
329 this domain.

330

### 331 **Construction of paired allele compatibility matrix**

332 To construct SNP profiles, SNPs shared by at least two members of the *T. rubrum*  
333 dataset were selected. Private SNPs are not informative for a paired allele compatibility  
334 test because they can never produce a positive result. These profiles were then counted  
335 across the genome to construct SNP profiles via a custom Perl script. We required  
336 profiles to be present at least twice, to minimize the signal from homoplasic mutations.  
337 Pairwise tests were then conducted between each of the profiles to look for all four  
338 possible allele combinations, which would only occur via either mating or homoplasic  
339 mutations.

340

### 341 **Linkage disequilibrium calculation**

342 Linkage disequilibrium was calculated for *T. rubrum* SNPs in 1kb windows of all  
343 scaffolds with VCFtools version 1.14 [42], using the --hap-r2 option with a minimum  
344 minor allele frequency of 0.2.

345

### 346 **Data Availability**

347 All genomic data is available in NCBI and can be accessed via the accession numbers  
348 in Table S2. The NCBI GenBank accession numbers of the three MLST loci are listed in  
349 Table S3.

350

351

## 352 **Results**

### 353 **Relationship of global *Trichophyton* isolates using MLST**

354 To examine the relationship of global isolates of *T. rubrum*, we sequenced three loci in  
355 each of 104 *Trichophyton* isolates and carried out phylogenetic analysis. The typed

356 isolates included 91 *T. rubrum* isolates, 11 *T. interdigitale* isolates, and 2 *T. benhamiae*  
357 isolates (**Table S1**). In addition, data from the genome assemblies of additional  
358 dermatophyte species (*T. verrucosum*, *T. tonsurans*, *T. equinum*, and *M. gypseum*)  
359 were also included. Three loci — the *TruMDR1* ABC transporter [19], an intergenic  
360 region (IR), and an alpha-1,3-mannosyltransferase (CAP59 protein domain) — were  
361 sequenced in each isolate. Phylogenetic analysis of the concatenated loci can resolve  
362 species boundaries between the seven species (**Figure 1**). A large branch separates a  
363 *T. benhamiae* isolate (MR857) from the previously described genome sequenced  
364 isolate (CBS 112371) (**Figure 1**), and the sequences of two loci of a second *T.*  
365 *benhamiae* isolate (MR827) were identical to those of MR857 (**Table S3**). Sequencing  
366 of the ITS region of the MR857 and MR827 isolates revealed high sequence similarity to  
367 isolates from the *T. benhamiae* African race (**Methods**), which is more closely related to  
368 *T. bullosum* than isolates of *T. benhamiae* Americano-European race including  
369 CBS112371 [52]. Otherwise, the species relationships and groups are consistent  
370 between studies.

371  
372 MLST analysis demonstrated that the *T. rubrum* isolates were nearly identical at the  
373 three sequenced loci. Remarkably, of the 84 *T. rubrum* isolates sequenced at all three  
374 loci, 83 were identical at all positions of the three loci sequenced (genotype 2, **Table**  
375 **S3**). Only one isolate, 1279, displayed a single difference at one site in the *TruMDR1*  
376 gene (genotype 3, **Table S3**). For the remaining six isolates, sequence at a subset of  
377 the loci was generated and matched that of the predominant genotype. Thus, MLST  
378 was not sufficient to discern the phylogenetic substructure in the *T. rubrum* population  
379 that included six isolates representing different morphotypes (**Table S3**). Similarly, the  
380 11 *T. interdigitale* isolates were highly identical at these three loci; two groups were  
381 separated by a single nucleotide difference in the IR and the third group contained a 6-  
382 base deletion overlapping the same base of the IR (genotypes 1, 5 and 6, **Table S3**).  
383 Although most species can be more easily discriminated based on the MLST sequence,  
384 *T. equinum* and *T. tonsurans* isolates differed only by a single transition mutation in the  
385 IR, which illustrates the remarkable clonality of these species.

386

## 387 **Genome sequencing and refinement of phylogenetic relationships**

388 As MLST analysis was insufficient to resolve the population substructure of the *T.*  
389 *rubrum* species complex, we sequenced the complete genomes of *T. rubrum* isolates  
390 representing worldwide geographical origins and five morphotypes: *fischeri*, *kanei*,  
391 *megninii*, *raubitschekii*, and *soudanense*. We generated whole genome Illumina  
392 sequences for ten *T. rubrum* and two *T. interdigitale* isolates (**Table S2**). The sequence  
393 of each isolate was assembled and utilized to predict gene sets. The *T. rubrum*  
394 assembly size was very similar across isolates, ranging from 22.5 to 23.2 Mb (**Table**  
395 **S5**). The total predicted gene numbers were also similar across the isolates, with  
396 between 8,616 and 9,064 predicted genes in the ten *T. rubrum* isolates, and 7,993 and  
397 8,116 predicted genes in the two *T. interdigitale* isolates (**Table S5**).

398  
399 To infer the phylogenetic relationship of these isolates and other previously sequenced  
400 *Trichophyton* isolates, we identified 5,236 single-copy orthologs present in all species  
401 and estimated a phylogeny with RAxML [48] (**Figure 2A**). This phylogeny more  
402 precisely delineates the species groups than that derived from the MLST loci and also  
403 illustrates the relationship between the *T. rubrum* isolates (**Figure 2B**). The results of  
404 this analysis suggest that the *fischeri* morphotype is not monophyletic, as one *fischeri*  
405 isolate (CBS100081) is more closely related to the *raubitschekii* isolate than to the other  
406 *fischeri* isolate (CBS 288.86). While a subset of seven *T. rubrum* isolates appear  
407 closely related, others show much higher divergence, including the *soudanense* isolate,  
408 the *megninii* isolate, the MR1459 isolate, and the CBS 118829 isolate representing the  
409 reference genome. The *soudanense* isolate (CBS 452.61) was placed as an outgroup  
410 relative to the other *T. rubrum* isolates; this is consistent with this isolate being part of a  
411 clade more closely related to *T. violaceum* than to *T. rubrum* [6] and with the re-  
412 establishment of *soudanense* isolates as a separate species [3].

413  
414 To further classify the two *T. interdigitale* isolates, we assembled the ITS region of the  
415 ribosomal DNA locus and compared the sequences to previously classified ITS  
416 sequences, as *T. interdigitale* isolates differ from *T. mentagrophytes* at the ITS locus  
417 [3,53]. For the two genomes of these species that we sequenced, MR816 was identical



418 to *T. interdigitale* at the ITS1 locus, whereas the H6 isolate appears intermediate  
419 between *T. interdigitale* and *T. mentagrophytes*, containing polymorphisms specific to  
420 each group (**Figure S1**). Genomic analysis of allele sharing across a wider set of *T.*  
421 *interdigitale* and *T. mentagrophytes* isolates could be used to evaluate the extent of  
422 hybrid genotypes and genetic exchange between these two species.

423

#### 424 ***MAT1-1* prevalence and clonality in *T. rubrum***

425 To address if the *T. rubrum* population is capable of sexual reproduction, we surveyed  
426 the *MAT* locus of all isolates. Using either gene content in assembled isolates or a PCR  
427 assay to assign mating type, we found that 79 of the 80 *T. rubrum* isolates contained  
428 the alpha domain gene at the *MAT* locus (*MAT1-1*). In addition, a set of 55 isolates from  
429 Turkey were found to harbor the *MAT1-1* allele based on a PCR assay (**Figure S2**).  
430 However, the *T. rubrum* morphotype *megrinii* isolate contained an HMG gene at the  
431 *MAT* locus (*MAT1-2*) (**Figure 3, Table S1**). The presence of both mating types suggests  
432 that this species could be capable of mating under some conditions. However the high  
433 frequency of a single mating type strongly suggests that *T. rubrum* largely undergoes  
434 clonal growth, although other interpretations are also possible (see **Discussion**). In  
435 further support of this, a study of 206 *T. rubrum* clinical isolates from Japan noted that  
436 all were of the *MAT1-1* mating type [14].

437

438 A closer comparison of the genome sequences of *T. rubrum* isolates also supports a  
439 clonal relationship of this population. Phylogenetic analysis of the seven most closely  
440 related *T. rubrum* isolates using SNPs between these isolates (see below) suggests that  
441 the isolates have a similar level of divergence from each other (**Figure S3**). This  
442 supports that these *MAT1-1* *T. rubrum* isolates have likely undergone clonal expansion.

443

444 To test for recombination that could reflect sexual reproduction within the *T. rubrum*  
445 population sampled here, we conducted a genome-wide paired allele compatibility test  
446 to look for the presence of all four products of meiosis (**Figure 4**). This test is a  
447 comparison between two paired polymorphic sites in the population. While the presence  
448 of three of the four possible allele combinations at two sites in a population is possible



449 through a single mutation and identity by descent, the presence of all four combinations  
450 requires either recombination, or less parsimoniously, a second homoplastic mutation.  
451 Four positive tests resulted from this analysis (out of 21 possible), including allele  
452 combinations that occurred a minimum of 13 times. This may suggest that  
453 recombination is a rare event arising through infrequent sexual recombination occurring  
454 in this population although the same mutations and combinations arising via homoplasmy  
455 (or selection) are difficult to exclude. Based on the number of triallelic sites in the  
456 dataset (19), we would predict 9.5 homoplastic sites to have occurred by random  
457 chance, which is similar to the number of sites responsible for the positive signals in the  
458 compatibility test. In addition, linkage disequilibrium does not decay over increasing  
459 distance between SNPs in *T. rubrum* (**Figure S4**), which further supports a low level of  
460 recombination in this species; sequencing additional diverse isolates would help to  
461 address if some isolates or lineages were more prone to recombination.

462

463 We also characterized the *MAT* locus of the newly sequenced *T. interdigitale* isolates  
464 (H6 and MR816) and found that both contain an HMG domain gene. These *T.*  
465 *interdigitale* isolates were more closely related to *T. equinum* (*MAT1-2*) and *T.*  
466 *tonsurans* (*MAT1-1*) than *T. rubrum* (**Figure 2A**). To survey the mating type across a  
467 larger set of *T. interdigitale* isolates, a set of 11 additional isolates from Turkey were  
468 typed. Based on PCR analysis, all *T. interdigitale* isolates harbor the *MAT1-2* allele  
469 (**Figure S2**).

470

471 The mating abilities of the isolates were tested by conducting mating assays with  
472 potentially compatible isolates of *T. rubrum*, including the *magninii* morphotype, *T.*  
473 *interdigitale*, and *T. simii* (**Table S7**). These experiments were conducted using both  
474 Takashio and E medium at room temperature (approximately 21 to 22°C) without  
475 Parafilm in the dark. Although the assay plates were incubated for longer than five  
476 months, ascomata or ascomatal initials were not observed (**Figure S5**). While it is  
477 possible that mating may occur under cryptic conditions [54], this data suggests that the  
478 conditions tested are not sufficient for the initiation of mating structures in *T. rubrum*.

479

## 480 **Genome-wide variation patterns in *T. rubrum***

481 SNP variants were identified between *T. rubrum* isolates to examine the level of  
482 divergence within this species complex (**Table S8**). On average, *T. rubrum* isolates  
483 contain 8,092 SNPs compared to the reference genome of the CBS118892 isolate; this  
484 reflects a bimodal divergence pattern where most isolates including three morphotypes  
485 (*fischeri*, *kanei*, and *raubitscheckii*) have an average of 3,930 SNPs and two more  
486 divergent isolates (morphotypes *megninii* and *soudanense*) have an average of 24,740  
487 SNPs. The average nucleotide diversity ( $\pi$ ) for all 10 *T. rubrum* isolates is 0.00054;  
488 excluding the two divergent morphotypes, the average nucleotide diversity is 0.00031.  
489 By comparison, the average nucleotide diversity of the fungal pathogen *Cryptococcus*  
490 *neoformans* var. *grubii*, which is actively recombining as evidenced by low linkage  
491 disequilibrium [43,55], is 0.0074, a level approximately 24-fold higher than that in *T.*  
492 *rubrum* (**Methods**, [43]). Even higher levels of nucleotide diversity have been reported  
493 in global populations of other fungi (see **Discussion**). A similar magnitude of SNPs  
494 separate the two *T. interdigitale* isolates; 22,568 SNPs were identified based on the  
495 alignment of H6 reads to the MR 816 assembly. Across all isolates, SNPs were  
496 predominantly found in intergenic regions for both species, representing 76% and 81%  
497 of total variants respectively (**Table 1**, **Table S8**). Within genes, the higher ratio of  
498 nonsynonymous relative to synonymous changes among the closely related *T. rubrum*  
499 isolates (**Table 1**) is consistent with lower purifying selection over recent evolutionary  
500 time [56].

501  
502 Examining the frequency of SNPs across the *T. rubrum* genome revealed high diversity  
503 regions that flank the mating type locus in the two divergent isolates. Across all isolates,  
504 some regions of the genome are over-represented for SNPs, including the smallest  
505 scaffolds of the reference genome (**Figure 5**); these regions contain a high fraction of  
506 repetitive elements [15]. The largest high diversity window unique to the *T. rubrum*  
507 morphotype *megninii* was found in an ~810-kb region encompassing the mating type  
508 locus on scaffold 2; a smaller high diversity region spanning the mating type locus was  
509 found in the diverged *soudanense* isolate (**Figure 5**). The higher diversity found in this  
510 location could reflect introgressed regions from recent outcrossing or could be

511 associated with lower recombination proximal to the mating type locus, resulting in  
512 stratification of linked genes.

513

#### 514 **Gene content variation in *T. rubrum* and *T. interdigitale***

515 To examine variation in gene content in the *Trichophyton rubrum* species complex, we  
516 first measured copy number variation across the genome. Duplicated and deleted  
517 regions of the genome were identified based on significant variation in normalized read  
518 depth (Methods). We observed increased copy number only for two adjacent 26 kb  
519 regions of scaffold 4 in two isolates (MR850 and MR1448) (**Figure S6**). Both of these  
520 regions had nearly triploid levels of coverage (**Table S9**). While ploidy variation is a  
521 mechanism of drug resistance in fungal pathogens, none of the 25 total genes in these  
522 regions (**Table S10**) are known drug targets or efflux pumps. These regions include two  
523 genes classified as fungal zinc cluster transcription factors; this family of transcription  
524 factors was previously noted to vary in number between dermatophyte species [15]. A  
525 total of 12 deleted regions (CNVnator p-val <0.01) ranging in size from 4 to 37 kb were  
526 also identified in a subset of genomes (**Table S11**). Two of these regions include genes  
527 previously noted to have higher copy number in dermatophyte genomes, a  
528 nonribosomal peptide synthase (NRPS) gene (TERG\_02711) and a LysM gene  
529 (TERG\_02813) (**Table S12**). Overall this analysis suggests recent gain or loss in  
530 dermatophytes for a small set of genes including transcription factors, NRPS, and LysM  
531 domain proteins.

532 We next examined candidate loss of function mutations in the *T. rubrum* species  
533 complex. For the 8 closely related *T. rubrum* isolates, an average of 8.1 SNPs are  
534 predicted to result in new stop codons, disrupting protein coding regions; in the  
535 *soudanense* and *megrinii* isolates, an average of 58.5 SNPs result in new stop codons.  
536 These predicted loss of function mutations do not account for previously noted  
537 phenotypic differences between the morphotypes; no stop codons were found in the  
538 seven genes involved in histidine biosynthesis (*HIS1-HIS7*) in the histidine auxotroph *T.*  
539 *rubrum* morphotype *megrinii* or in urease genes in *T. rubrum* morphotype  
540 *raubitscheckii*.

541

542 Comparison of the first representative genomes for *T. interdigitale* (isolates MR816 and  
543 H6) to those of dermatophyte species highlighted the close relationship of *T.*  
544 *interdigitale* to *T. tonsurans* and *T. equinum*. These three species are closely related  
545 (**Figure 2**), sharing 7,618 ortholog groups, yet there are also substantial differences in  
546 gene content. A total of 1,253 orthologs groups were present only in *T. equinum* and *T.*  
547 *tonsurans* and 512 ortholog groups were present only in both *T. interdigitale* isolates.  
548 However, there were no significant differences in functional groups between these  
549 species based on PFAM domain analysis, suggesting no substantial gain or loss of  
550 specific protein families. Two PFAM domains were unique to the *T. interdigitale* isolates  
551 and present in more than one copy: PF00208, found in ELFV dehydrogenase family  
552 members and PF00187, a chitin recognition protein domain. This chitin binding domain  
553 is completely absent from the *T. equinum* and *T. tonsurans* genomes while in *T.*  
554 *interdigitale* this domain is associated with the glycosyl hydrolase family 18 (GH18)  
555 domain [57]. GH18 proteins are chitinases and some other members of this family also  
556 contain LysM domains. We also examined genes in the ergosterol pathway for variation,  
557 as this could relate to drug resistance; while this pathway is highly conserved in  
558 dermatophytes [15], *T. interdigitale* isolates had an extra copy of a gene containing the  
559 ERG4/ERG24 domain found in sterol reductase enzymes in the ergosterol biosynthesis  
560 pathway. The *ERG4* gene encodes an enzyme that catalyzes the final step in ergosterol  
561 biosynthesis, and it is possible that an additional copy of this gene results in higher  
562 protein levels to help ensure that this step is not rate limiting.

563  
564 These comparisons also highlighted the recent dynamics of the LysM family, which  
565 binds bacterial peptidoglycan and fungal chitin [58]. Dermatophytes contain high  
566 numbers of LysM domain proteins ranging from the 10 genes found in *T. verrucosum* to  
567 31 copies found in *M. canis* (**Table S13, [15]**). Both the class of LysM proteins with  
568 additional catalytic domains and the larger class consists of proteins with only LysM  
569 domains, many of which contain secretion signals and may represent candidate  
570 effectors [15], vary in number across the dermatophytes. Isolates from the *T. rubrum*  
571 species complex have 16 to 18 copies of LysM proteins compared to the 15 found in the  
572 previously reported genome of the CBS 118892 isolate (**Table S13**). One of the

573 additional LysM genes present in all of the newly sequenced isolates encodes a  
574 polysaccharide deacetylase domain involved in chitin catabolism. There is also an  
575 additional copy of a gene with only a LysM domain in 9 of the 10 new *T. rubrum* isolates  
576 (**Table S13**). The genomes of the *T. interdigitale* isolates have only 14 genes containing  
577 a LysM binding domain, and are missing a LysM gene encoding GH18 and Hce2  
578 domains (**Figure S7**). Notably, this locus is closely linked to genes encoding additional  
579 LysM domain proteins in some species (**Figure S7**). The variation observed in the LysM  
580 gene family suggests that recognition of chitin appears to be highly dynamic based on  
581 these differences in gene content and domain composition.

582

## 583 **Discussion**

584

585 In this study, we selected diverse *T. rubrum* isolates for genome sequencing, assembly,  
586 and analysis and surveyed a wider population sample using MLST analysis. These  
587 isolates include multiple morphotypes, which show noted phenotypic variation yet are  
588 assigned to the same species based on phylogenetic analyses [3,53]. The *T. rubrum*  
589 morphotype *soudanense* and *T. rubrum* morphotype *megninii* show higher divergence  
590 from a closely related subgroup that includes the *kanej*, *raubitschekii*, and *fischerii*  
591 morphotypes, as well as most other *T. rubrum* isolates.

592

593 Our MLST and whole genome analyses provide strong support that *T. rubrum* is highly  
594 clonal and may be primarily asexual or at least infrequently sexually reproducing.  
595 Across 135 isolates examined, 134 were from a single mating type (*MAT1-1*). Only the  
596 *T. rubrum* type *megninii* isolate, Consistent with prior reports [3,53], only the *T. rubrum*  
597 morphotype *megninii* isolates contains the opposite mating type (*MAT1-2*) while all  
598 other *T. rubrum* isolates that are of *MAT1-1* type. Direct tests of mating between these  
599 and other species did not find evidence for mating and sexual development. While  
600 mating was not detected, studies in other fungi have required specialized conditions and  
601 long periods of time to detect sexual reproduction [59]. As genes involved in mating and  
602 meiosis are conserved in *T. rubrum* [15], gene loss does not provide a simple  
603 explanation for the inability to mate. Sexual reproduction might occur rarely under

604 specific conditions such as specific temperatures as found for *Trichophyton onychocola*  
605 [60], may be geographically restricted, as the opposite mating type *megninii* morphotype  
606 is generally found in the Mediterranean [61], or could be unisexual as in some other  
607 fungi such as *Cryptococcus neoformans* [62].

608  
609 As MLST data provided no resolution of the substructure of the *T. rubrum* population,  
610 we examined whole genome sequences for 8 diverse isolates. Analysis of the sequence  
611 read depth revealed that while some small regions of the genome show amplification or  
612 loss, there is no evidence for aneuploidy of entire chromosomes. Most of these *T.*  
613 *rubrum* isolates contain an average of only 3,930 SNPs (0.01% of the genome) and  
614 phylogenetic analysis revealed little genetic substructure. Two isolates were more  
615 divergent with an average of 24,740 SNPs (0.06% of the genome); one of these was of  
616 the recently proposed separated species *T. soudanense* [3], and the other was the *T.*  
617 *rubrum* morphotype *megninii* isolate. While the similar level of divergence raises the  
618 question of whether morphotype *megninii* isolates could also be a separate species, this  
619 has not yet been proposed when considering additional phenotypic data in addition to  
620 molecular data, however further study would help clarify species assignments. The low  
621 level of variation is remarkable in comparison to other fungal pathogens; for example,  
622 while *T. rubrum* isolates are identical at 99.97% of positions on average, isolates of  
623 *Cryptococcus neoformans* var. *grubii* isolates are 99.36% identical on average [43,55].  
624 Global populations of *Saccharomyces* have even higher reported diversity [63]. The low  
625 diversity and the dependency on the human host for growth suggests that *T. rubrum*  
626 may have a low effective population size impacted by the reduction of intra-species  
627 variation by genetic drift. In addition, direct tests for recombination found a low level of  
628 candidate reassortments that was not in excess of the estimated number of  
629 homoplasmic mutations; further, as there was no apparent decay of linkage  
630 disequilibrium over genetic distance, our analyses support the overall clonal nature of  
631 this species. The high clonality observed in *T. rubrum* is also supported by MLST  
632 analysis of eight microsatellite markers in approximately 230 *T. rubrum* isolates,  
633 including morphotypes from diverse geographic origins [8]. With additional genome  
634 sequencing geographic substructure may become more apparent; the fungal pathogen



635 *Talaromyces marneffeii* also displays high clonality yet isolates from the same country or  
636 region are more closely related [64]. While low levels of diversity seems surprising in a  
637 common pathogen, this is similar to findings in some bacterial pathogens including  
638 *Mycobacterium tuberculosis* and *Mycobacterium leprae* [65,66], which also display high  
639 clonality despite phenotypic variation.

640  
641 LysM domain proteins are involved in dampening host recognition of fungal chitin [67]  
642 and can also regulate fungal growth and development [68], yet their specific function in  
643 dermatophytes and closely related fungi is not well understood. We also observed  
644 variation in genes containing the LysM domain across the sequenced isolates, both in  
645 the gene number and domain organization. LysM genes are present in higher copy  
646 number in dermatophytes than related fungi in the Ascomycete order Onygenales [15].  
647 Recent sequencing of additional non-pathogenic species in this order related to  
648 *Coccidioides* revealed that most LysM copies found in dermatophytes have a homolog  
649 [69]. Although this analysis excluded *M. canis* — the dermatophyte species with the  
650 highest LysM count— this suggests that dermatophytes have retained rather than  
651 recently duplicated many of their LysM genes. However, changes in the domain  
652 composition of both genes with catalytic domains and those with only LysM domains,  
653 many of which represent candidate effectors, highlights the dynamic evolution of the  
654 LysM family in the dermatophytes. Studies of LysM genes in dermatophytes are needed  
655 to determine whether these genes serve similar or different roles in these species.

656  
657 *T. rubrum* is only found as a pathogen of humans, though this adaptation is more recent  
658 relative to the related species that infect other animals or grow in the environment.  
659 Unlike the obligate human fungal pathogen *Pneumocystis jirovecii* [70,71], *T. rubrum*  
660 does not display widespread gene loss [15] indicative of host dependency for growth;  
661 further, its genome size is also comparable to related dermatophyte species, supporting  
662 no overall reduction [15]. The presence of a single mating type in the vast majority of  
663 isolates and limited evidence of recombination suggests that sexual reproduction of *T.*  
664 *rubrum* may have been recently lost or may be rarely occurring in specific conditions or



665 geographic regions. This may be linked to the specialization as a human pathogen, as  
666 mating may be optimized during environmental growth in the soil [53].

667

668

### 669 **Acknowledgements**

670 We thank the Broad Institute Genomics Platform for generating the DNA sequence  
671 described here. We thank Yonathan Lewit for technical assistance and Cecelia Wall for  
672 providing helpful comments on the manuscript. Financial support was provided by the  
673 National Human Genome Research Institute grant number U54HG003067 to the Broad  
674 Institute and by NIH/NIAID R37 MERIT Award AI39115-20 and RO1 Award AI50113-13  
675 to JH. This study was supported by The Scientific and Technological Research Council  
676 of Turkey-2219 Research Fellowship Programme for International Researchers Project  
677 No. [1059B191501539] to AD and Brazilian funding agency FAPESP Fundação de  
678 Amparo à Pesquisa do Estado de São Paulo, Postdoctoral Fellowship 12/22232-8 and  
679 13/19195-6 to GFP.

680

### 681 **Author contributions**

682 C.A.C., D.A.M., T.C.W. and J.H. conceived and designed the project. A.D., B.M, S.H.,  
683 M. I., R.B., B.O., Y.G, N.M.M, and T.W. provided the isolates. W.L. and A.D. performed  
684 the laboratory experiments. G.F.P, D.A.M, W.L, A.D., R.B.B, A.A, J.M., G,T.S., S.Y,  
685 Q.Z, and C.A.C analyzed the data. C.A.C. and J.H. wrote the paper with input from all  
686 authors. C.A.C. and J.H. supervised and coordinated the project.

687

688

689

690 **Table**

**Table 1. Variation in *T. rubrum* SNP rate and class**

| Isolate                                                        | Total Number of SNPs | SNPs in CDS* | SYN*    | NSY*    | pN/pS* |
|----------------------------------------------------------------|----------------------|--------------|---------|---------|--------|
| <i>T. rubrum</i> MR1448                                        | 4,283                | 374          | 83      | 287     | 1.15   |
| <i>T. rubrum</i> MR1459                                        | 2,188                | 436          | 103     | 317     | 1.02   |
| <i>T. rubrum</i> MR850                                         | 4,203                | 387          | 88      | 289     | 1.09   |
| <i>T. rubrum</i> D6                                            | 4,121                | 484          | 112     | 363     | 1.08   |
| <i>T. rubrum</i> (morphotype <i>fischeri</i> ) CBS 100081      | 4,199                | 409          | 94      | 307     | 1.09   |
| <i>T. rubrum</i> (morphotype <i>fischeri</i> ) CBS 288.86      | 4,147                | 375          | 84      | 283     | 1.12   |
| <i>T. rubrum</i> (morphotype <i>kanei</i> ) CBS 289.86         | 4,491                | 474          | 116     | 350     | 1.00   |
| <i>T. rubrum</i> (morphotype <i>raubitschekii</i> ) CBS 202.88 | 3,808                | 375          | 83      | 285     | 1.14   |
| <i>T. rubrum</i> (morphotype <i>megninii</i> ) CBS 735.88      | 26,406               | 7,328        | 3,069   | 4,185   | 0.45   |
| <i>T. rubrum</i> (morphotype <i>soudanense</i> ) CBS 452.61    | 23,073               | 6,253        | 2,377   | 3,808   | 0.53   |
| <i>T. interdigitale</i> MR816                                  | 1,223,298            | 591,173      | 395,250 | 194,498 | 0.16   |
| <i>T. interdigitale</i> H6                                     | 1,183,411            | 585,288      | 393,079 | 190,826 | 0.16   |

691 \*CDS, coding sequence; SYN, synonymous SNP sites; NSY, non-synonymous SNP sites; pN/pS, (NSY/total NSY  
 692 sites)/(SYN/total SYN sites).

693

694

695 **Figure Legends**

696 **Figure 1.** Phylogeny inferred from concatenated MLST sequences. Three MLST loci  
697 (ABC transporter, outer membrane protein, and CAP59 protein) were amplified and  
698 sequenced from 79 isolates and sequences were identified in an additional 19  
699 assemblies. The concatenated sequence for each isolate was used to build a maximum  
700 likelihood tree using MEGA 5.2. Isolate MR1168 is representative of 73 *T. rubrum*  
701 isolates that have identical MLST sequences.

702

703 **Figure 2.** Phylogenetic relationship of *Trichophyton* isolates. A total of 5,236 single copy  
704 genes were each aligned with MUSCLE; the concatenated alignment was used to infer  
705 a species phylogeny with RAxML (GTRCAT model) with 1,000 bootstrap replicates  
706 using either A. all species including the outgroup *M. gypseum* or B. only *Trichophyton*  
707 *rubrum* isolates.

708

709 **Figure 3.** Alignment of the mating type locus of selected isolates. Mating type genes of  
710 *T. rubrum* morphotype *megrinii* (CBS 735.88) and *T. rubrum* (CBS 188992) are shown  
711 along the x- and y- axes, respectively, with regions aligning by NUCmer show in the  
712 dotplot. The alignment extends into two hypothetical proteins (HP) immediately flanking  
713 the alpha or HMG domain gene that specifies mating type. Most *T. rubrum* (*MAT1-1*)  
714 isolates contain an alpha domain protein (blue) at the *MAT* locus. In contrast, the *T.*  
715 *rubrum* morphotype *megrinii* isolate contains an HMG domain protein (green)  
716 representing the opposite mating type (*MAT1-2*). All sequenced *T. interdigitale* isolates  
717 are also of *MAT1-2* mating type including MR816. Gene locus identifiers are shown for  
718 the genes flanking each locus (prefix TERG, H106, and H109).

719

720 **Figure 4.** Paired allele compatibility test suggests limited evidence for sexual  
721 reproduction. A. A single example of a positive paired allele compatibility test from the  
722 *T. rubrum* population. In this test, two loci are examined and typed across the  
723 population. To perform a meaningful test, at least two individuals in the population must  
724 share a variant allele at each site. Here alternative SNPs are depicted in red and  
725 reference in white. Evidence for recombination is provided by any pairwise comparison

726 of two loci in which isolates are present where red-red, white-white, red-white, and  
727 white-red combinations are all found (AB, Ab, aB, and ab) satisfying the allele  
728 compatibility test and providing evidence for recombination. B. Paired allele  
729 compatibility tests were performed for all isolates in the *T. rubrum* population across the  
730 entire genome. SNP profiles were grouped into unique and informative allele patterns  
731 and collapsed, with the number of occurrences of each profile across the genome listed.  
732 Thus, the larger the number, the more common that SNP distribution is in the  
733 population. Pairwise tests were then conducted for each combination of SNP profiles.  
734 Reference nucleotides are indicated by white and variant by red. The pairwise matrix  
735 displays the results of all of these tests; a green square in the pairwise matrix is  
736 indicative of a positive test for the pairwise comparison and thus provides potential  
737 evidence of recombination.

738  
739 **Figure 5.** Genome-wide SNP frequency highlights hotspots. For each panel, the  
740 frequency of SNPs in 5-kb windows is shown across the genome. The genome  
741 assembly of isolate CBS 11892 was used for all comparisons, and scaffolds are ordered  
742 along the x-axis with grey lines representing scaffold boundaries. Red dots indicate the  
743 position of the mating type locus.

744

#### 745 **Supplemental Figure and Table Legends**

746

747 **Figure S1. ITS sequence variation in *T. interdigitale*.** Aligned ITS sequence is shown  
748 for four isolates, including the two for which whole genomes were sequenced (H6 and  
749 MR816) and two previously characterized isolates (AF168124 and AY062119). Isolate  
750 AY062119 has been re-classified as *T. mentagrophytes*. Variant sites are highlighted.

751

752 **Figure S2. Detection of *MAT1-1* in *T. rubrum* and *MAT1-2* in *T. interdigitale* by**  
753 **PCR.** A. PCR-based determination of the *MAT1-1* alpha domain of *T. rubrum* isolates:  
754 *T. rubrum* MR 851, *T. megninii* CBS 389.58, *T. megninii* CBS 384.64, and *T. megninii*  
755 CBS 417.52. The alpha domain *MAT1-1* gene was identified from samples = 1-12 and  
756 MR 851 *T. rubrum*; the alpha domain *MAT1-1* gene was not identified from *T. megninii*

757 CBS 389.58, *T. megninii* CBS 384.64, or *T. megninii* CBS 417.52. M: DNA ladder. B.  
758 PCR-based determination of *MAT 1-2* HMG domain of *T. rubrum*: *T. rubrum* MR851, *T.*  
759 *megninii* CBS 389.58, *T. megninii* CBS 384.64, and *T. megninii* CBS 417.52. The HMG  
760 domain *MAT1-2* gene was identified from *T. megninii* CBS 389.58, *T. megninii* CBS  
761 384.64, and *T. megninii* CBS 417.52, and was not identified from *T. rubrum* isolate = 1-  
762 12 and *T. rubrum* MR 851, M: DNA ladder. C. PCR-based determination of *MAT1-2*  
763 HMG domain of *T. interdigitale*. *T. interdigitale* isolates = 1-9, *T. interdigitale* MR8801  
764 (positive control), and *T. rubrum* MR851 (negative control), M; DNA ladder. D. PCR  
765 based determination of *MAT 1-1* alpha domain of *T. interdigitale* isolates. *T. interdigitale*  
766 isolates = 1-9, *T. interdigitale* MR8801 (negative control), and *T. rubrum* MR851  
767 (positive control). M: DNA ladder.

768

769 **Figure S3. Phylogenetic relationship and sharing of variant sites of sequenced *T.***  
770 ***rubrum* isolates.** A. Phylogenetic relationship of *T. rubrum* isolates inferred using  
771 RAxML (Methods). B. Classification of SNP sites based on conservation across the  
772 sequenced isolates; unique: only in one isolate; shared: in two to seven isolates; fixed:  
773 in all eight isolates.

774 **Figure S4. Lack of decay of linkage disequilibrium (LD) in *T. rubrum*.** LD ( $r^2$ ) was  
775 calculated for all pairs of SNPs separated by 0 to 300 kb and then averaged for every  
776 1kb. LD values for each window were then calculated by averaging over all pairwise  
777 calculations in the window.

778

779 **Figure S5. Mating assays.** A. Mating assay plate; *T. rubrum* and *T. interdigitale* on E  
780 medium. B. Mating assay plate; *T. rubrum* and *A. simii* (a) E medium, (b) Takashio  
781 medium eight weeks. C. *T. rubrum* and *T. megninii* on E medium for eight weeks.

782

783 **Figure S6. Read depth of sequenced isolates.** Reads from each isolate were aligned  
784 to the *T. rubrum* reference genome and normalized read depth was computed for 5kb  
785 windows. Read depth is even across the reference genome for most isolates, with small  
786 regions of higher depth detected in some isolates.

787

788 **Figure S7. Variation in LysM-Hce gene cluster across sequenced dermatophytes.**

789 In *T. rubrum*, the LysM-Hce gene is closely linked to two other LysM genes; this  
790 organization is most similar to that found in *M. canis*, although these genes are located  
791 on two different scaffolds.

792

793 **Table S1. Properties of sequenced isolates.**

794 **Table S2. Accessions for sequenced genomes.**

795 **Table S3. MLST sequence, genotypes, and GenBank accession numbers.**

796 **Table S4. Primers for MLST gene amplification.**

797 **Table S5. *Trichophyton* genome assembly statistics.**

798 **Table S6. Primer pairs used for mating type determination of *T. rubrum***

799 **Table S7. Mating assays and results.**

800 **Table S8. Frequency of SNPs in *T. rubrum* and *T. interdigitale* isolates by mutation**  
801 **type.**

802 **Table S9. Duplicated regions in sequence isolates.**

803 **Table S10. List of genes found in duplicated regions.**

804 **Table S11. Deleted regions in sequenced isolates.**

805 **Table S12. List of genes in deleted regions in sequenced isolate**

806 **Table S13. Genes containing the LysM binding domain in dermatophytes**

807

808

## 809 References

- 810 1. Achterman RR, White TC. Dermatophytes. *Curr Biol*. 2013;23: R551-552.  
811 doi:10.1016/j.cub.2013.03.026
- 812 2. White TC, Findley K, Dawson TL, Scheynius A, Boekhout T, Cuomo CA, et al.  
813 *Fungi on the Skin: Dermatophytes and Malassezia*. Cold Spring Harb Perspect Med.  
814 2014;4. doi:10.1101/cshperspect.a019802
- 815 3. Gräser Y, Scott J, Summerbell R. The new species concept in dermatophytes—a  
816 polyphasic approach. *Mycopathologia*. 2008;166: 239–56. doi:10.1007/s11046-008-  
817 9099-y
- 818 4. Symoens F, Jousson O, Planard C, Fratti M, Staib P, Mignon B, et al. Molecular  
819 analysis and mating behaviour of the *Trichophyton mentagrophytes* species complex.  
820 *Int J Med Microbiol IJMM*. 2011;301: 260–266. doi:10.1016/j.ijmm.2010.06.001
- 821 5. Gräser Y, Kuijpers AF, Presber W, de Hoog GS. Molecular taxonomy of the  
822 *Trichophyton rubrum* complex. *J Clin Microbiol*. 2000;38: 3329–3336.
- 823 6. de Hoog GS, Dukik K, Monod M, Packeu A, Stubbe D, Hendrickx M, et al.  
824 Toward a novel multilocus phylogenetic taxonomy for the dermatophytes.  
825 *Mycopathologia*. 2017;182: 5–31. doi:10.1007/s11046-016-0073-9
- 826 7. Weitzman I, Summerbell RC. The dermatophytes. *Clin Microbiol Rev*. 1995;8:  
827 240–59.
- 828 8. Achterman RR, White TC. Dermatophyte virulence factors: identifying and  
829 analyzing genes that may contribute to chronic or acute skin infections. *Int J Microbiol*.  
830 2012;2012: 358305. doi:10.1155/2012/358305
- 831 9. de Hoog S, Monod M, Dawson T, Boekhout T, Mayser P, Gräser Y. Skin Fungi  
832 from Colonization to Infection. *Microbiol Spectr*. 2017;5.  
833 doi:10.1128/microbiolspec.FUNK-0049-2016
- 834 10. White TC, Oliver BG, Gräser Y, Henn MR. Generating and testing molecular  
835 hypotheses in the dermatophytes. *Eukaryot Cell*. 2008;7: 1238–45.  
836 doi:10.1128/EC.00100-08
- 837 11. Kane J, Salkin IF, Weitzman I, Smitka C. *Trichophyton raubitschekii*, sp. nov.  
838 *Mycotaxon*. 13: 259–266.
- 839 12. Gräser Y, Fröhlich J, Presber W, Hoog S de. Microsatellite markers reveal  
840 geographic population differentiation in *Trichophyton rubrum*. *J Med Microbiol*. 2007;56:  
841 1058–1065. doi:10.1099/jmm.0.47138-0
- 842 13. Metin B, Heitman J. Sexual reproduction in dermatophytes. *Mycopathologia*.  
843 2017;182: 45–55. doi:10.1007/s11046-016-0072-x
- 844 14. Li W, Metin B, White TC, Heitman J. Organization and evolutionary trajectory of  
845 the mating type (*MAT*) locus in dermatophyte and dimorphic fungal pathogens. *Eukaryot*  
846 *Cell*. 2010;9: 46–58. doi:10.1128/EC.00259-09
- 847 15. Symoens F, Jousson O, Packeu A, Fratti M, Staib P, Mignon B, et al. The  
848 dermatophyte species *Arthroderma benhamiae*: intraspecies variability and mating  
849 behaviour. *J Med Microbiol*. 2013;62: 377–385. doi:10.1099/jmm.0.053223-0
- 850 16. Young CN. Pseudo-Cleistothecia in *Trichophyton rubrum*. *Sabouraudia J Med*  
851 *Vet Mycol*. 1968;6: 160–162.
- 852 17. Anzawa K, Kawasaki M, Mochizuki T, Ishizaki H. Successful mating of  
853 *Trichophyton rubrum* with *Arthroderma simii*. *Med Mycol Off Publ Int Soc Hum Anim*  
854 *Mycol*. 2010;48: 629–34. doi:10.3109/13693780903437884



- 855 18. Kano R, Isizuka M, Hiruma M, Mochizuki T, Kamata H, Hasegawa A. Mating type  
856 gene (*MAT1-1*) in Japanese isolates of *Trichophyton rubrum*. *Mycopathologia*.  
857 2013;175: 171–173. doi:10.1007/s11046-012-9603-2
- 858 19. Martinez DA, Oliver BG, Gräser Y, Goldberg JM, Li W, Martinez-Rossi NM, et al.  
859 Comparative genome analysis of *Trichophyton rubrum* and related dermatophytes  
860 reveals candidate genes involved in infection. *mBio*. 2012;3: e00259-00212.  
861 doi:10.1128/mBio.00259-12
- 862 20. Burmester A, Shelest E, Glockner G, Heddergott C, Schindler S, Staib P, et al.  
863 Comparative and functional genomics provide insights into the pathogenicity of  
864 dermatophytic fungi. *Genome Biol*. 2011;12: R7. doi:10.1186/gb-2011-12-1-r7
- 865 21. Turin L, Riva F, Galbiati G, Cainelli T. Fast, simple and highly sensitive double-  
866 rounded polymerase chain reaction assay to detect medically relevant fungi in  
867 dermatological specimens. *Eur J Clin Invest*. 2000;30: 511–518.
- 868 22. Cervelatti EP, Fachin AL, Ferreira-Nozawa MS, Martinez-Rossi NM. Molecular  
869 cloning and characterization of a novel ABC transporter gene in the human pathogen  
870 *Trichophyton rubrum*. *Med Mycol*. 2006;44: 141–147.
- 871 23. Weitzman I, Silva-Hutner M. Non-keratinous agar media as substrates for the  
872 ascigerous state in certain members of the Gymnoascaceae pathogenic for man and  
873 animals. *Sabouraudia*. 1967;5: 335–340.
- 874 24. Fisher S, Barry A, Abreu J, Minie B, Nolan J, Delorey TM, et al. A scalable, fully  
875 automated process for construction of sequence-ready human exome targeted capture  
876 libraries. *Genome Biol*. 2011;12: R1. doi:10.1186/gb-2011-12-1-r1
- 877 25. Gnerre S, Maccallum I, Przybylski D, Ribeiro FJ, Burton JN, Walker BJ, et al.  
878 High-quality draft assemblies of mammalian genomes from massively parallel sequence  
879 data. *Proc Natl Acad Sci U A*. 2011;108: 1513–8. doi:10.1073/pnas.1017351108
- 880 26. Haas BJ, Zeng Q, Pearson MD, Cuomo CA, Wortman JR. Approaches to fungal  
881 genome annotation. *Mycology*. 2011;2: 118–141. doi:10.1080/21501203.2011.606851
- 882 27. Ren X, Liu T, Dong J, Sun L, Yang J, Zhu Y, et al. Evaluating de Bruijn graph  
883 assemblers on 454 transcriptomic data. *PLoS ONE*. 2012;7: e51188.  
884 doi:10.1371/journal.pone.0051188
- 885 28. Grabherr MG, Haas BJ, Yassour M, Levin JZ, Thompson DA, Amit I, et al. Full-  
886 length transcriptome assembly from RNA-Seq data without a reference genome. *Nat*  
887 *Biotechnol*. 2011;29: 644–652. doi:10.1038/nbt.1883
- 888 29. Haas BJ, Delcher AL, Mount SM, Wortman JR, Smith RK, Hannick LI, et al.  
889 Improving the Arabidopsis genome annotation using maximal transcript alignment  
890 assemblies. *Nucleic Acids Res*. 2003;31: 5654–66.
- 891 30. Wu CH, Apweiler R, Bairoch A, Natale DA, Barker WC, Boeckmann B, et al. The  
892 Universal Protein Resource (UniProt): an expanding universe of protein information.  
893 *Nucleic Acids Res*. 2006;34: D187–D191. doi:10.1093/nar/gkj161
- 894 31. Altschul SF, Madden TL, Schaffer AA, Zhang J, Zhang Z, Miller W, et al. Gapped  
895 BLAST and PSI-BLAST: a new generation of protein database search programs.  
896 *Nucleic Acids Res*. 1997;25: 3389–402.
- 897 32. Birney E, Clamp M, Durbin R. GeneWise and Genomewise. *Genome Res*.  
898 2004;14: 988–95. doi:10.1101/gr.1865504
- 899 33. Kurtz S, Phillippy A, Delcher AL, Smoot M, Shumway M, Antonescu C, et al.  
900 Versatile and open software for comparing large genomes. *Genome Biol*. 2004;5: R12.

- 901 34. Haas BJ, Salzberg SL, Zhu W, Pertea M, Allen JE, Orvis J, et al. Automated  
902 eukaryotic gene structure annotation using EvidenceModeler and the Program to  
903 Assemble Spliced Alignments. *Genome Biol.* 2008;9: R7. doi:10.1186/gb-2008-9-1-r7  
904 35. Borodovsky M, Lomsadze A, Ivanov N, Mills R. Eukaryotic gene prediction using  
905 GeneMark.hmm. *Curr Protoc Bioinforma.* 2003;Chapter 4: Unit4 6.  
906 doi:10.1002/0471250953.bi0406s01  
907 36. Stanke M, Steinkamp R, Waack S, Morgenstern B. AUGUSTUS: a web server  
908 for gene finding in eukaryotes. *Nucleic Acids Res.* 2004;32: W309-12.  
909 doi:10.1093/nar/gkh379  
910 37. Korf I. Gene finding in novel genomes. *BMC Bioinformatics.* 2004;5: 59.  
911 doi:10.1186/1471-2105-5-59  
912 38. Majoros WH, Pertea M, Salzberg SL. TigrScan and GlimmerHMM: two open  
913 source ab initio eukaryotic gene-finders. *Bioinforma Oxf Engl.* 2004;20: 2878–2879.  
914 doi:10.1093/bioinformatics/bth315  
915 39. Jurka J, Kapitonov VV, Pavlicek A, Klonowski P, Kohany O, Walichiewicz J.  
916 Repbase Update, a database of eukaryotic repetitive elements. *Cytogenet Genome*  
917 *Res.* 2005;110: 462–7. doi:10.1159/000084979  
918 40. Kent WJ. BLAT--the BLAST-like alignment tool. *Genome Res.* 2002;12: 656–64.  
919 41. Lowe TM, Eddy SR. tRNAscan-SE: a program for improved detection of transfer  
920 RNA genes in genomic sequence. *Nucleic Acids Res.* 1997;25: 955–64.  
921 42. Lagesen K, Hallin P, Rodland EA, Staerfeldt HH, Rognes T, Ussery DW.  
922 RNAmmer: consistent and rapid annotation of ribosomal RNA genes. *Nucleic Acids*  
923 *Res.* 2007;35: 3100–8.  
924 43. Li H. Aligning sequence reads, clone sequences and assembly contigs with  
925 BWA-MEM. *ArXiv13033997 Q-Bio.* 2013; Available: <http://arxiv.org/abs/1303.3997>  
926 44. McKenna A, Hanna M, Banks E, Sivachenko A, Cibulskis K, Kernytsky A, et al.  
927 The Genome Analysis Toolkit: a MapReduce framework for analyzing next-generation  
928 DNA sequencing data. *Genome Res.* 2010;20: 1297–303. doi:10.1101/gr.107524.110  
929 45. Danecek P, Auton A, Abecasis G, Albers CA, Banks E, DePristo MA, et al. The  
930 variant call format and VCFtools. *Bioinforma Oxf Engl.* 2011;27: 2156–2158.  
931 doi:10.1093/bioinformatics/btr330  
932 46. Rhodes J, Desjardins CA, Sykes SM, Beale MA, Vanhove M, Sakthikumar S, et  
933 al. Tracing Genetic Exchange and Biogeography of *Cryptococcus neoformans* var.  
934 *grubii* at the Global Population Level. *Genetics.* 2017;207: 327–346.  
935 doi:10.1534/genetics.117.203836  
936 47. Abyzov A, Urban AE, Snyder M, Gerstein M. CNVnator: an approach to discover,  
937 genotype, and characterize typical and atypical CNVs from family and population  
938 genome sequencing. *Genome Res.* 2011;21: 974–984. doi:10.1101/gr.114876.110  
939 48. Li L, Stoeckert CJ, Roos DS. OrthoMCL: identification of ortholog groups for  
940 eukaryotic genomes. *Genome Res.* 2003;13: 2178–89.  
941 49. Edgar RC. MUSCLE: multiple sequence alignment with high accuracy and high  
942 throughput. *Nucleic Acids Res.* 2004;32: 1792–7.  
943 50. Stamatakis A. RAXML-VI-HPC: maximum likelihood-based phylogenetic analyses  
944 with thousands of taxa and mixed models. *Bioinformatics.* 2006;22: 2688–90.  
945 doi:10.1093/bioinformatics/btl446  
946 51. Eddy SR. Accelerated Profile HMM Searches. *PLoS Comput Biol.* 2011;7:

- 947 e1002195. doi:10.1371/journal.pcbi.1002195  
948 52. Heidemann S, Monod M, Gräser Y. Signature polymorphisms in the internal  
949 transcribed spacer region relevant for the differentiation of zoophilic and anthropophilic  
950 strains of *Trichophyton interdigitale* and other species of *T. mentagrophytes sensu lato*.  
951 Br J Dermatol. 2010;162: 282–295. doi:10.1111/j.1365-2133.2009.09494.x  
952 53. Heitman J. Evolution of eukaryotic microbial pathogens via covert sexual  
953 reproduction. Cell Host Microbe. 2010;8: 86–99. doi:10.1016/j.chom.2010.06.011  
954 54. Rocha EPC, Smith JM, Hurst LD, Holden MTG, Cooper JE, Smith NH, et al.  
955 Comparisons of dN/dS are time dependent for closely related bacterial genomes. J  
956 Theor Biol. 2006;239: 226–235. doi:10.1016/j.jtbi.2005.08.037  
957 55. Brouta F, Descamps F, Monod M, Vermout S, Losson B, Mignon B. Secreted  
958 metalloprotease gene family of *Microsporum canis*. Infect Immun. 2002;70: 5676–83.  
959 56. Tran VDT, Coi ND, Feuermann M, Schmid-Siegert E, Băguț E-T, Mignon B, et al.  
960 RNA Sequencing-Based Genome Reannotation of the Dermatophyte *Arthroderma*  
961 *benhamiae* and Characterization of Its Secretome and Whole Gene Expression Profile  
962 during Infection. mSystems. 2016;1: e00036-16. doi:10.1128/mSystems.00036-16  
963 57. Davies G, Henrissat B. Structures and mechanisms of glycosyl hydrolases.  
964 Struct Lond Engl 1993. 1995;3: 853–859. doi:10.1016/S0969-2126(01)00220-9  
965 58. Buist G, Steen A, Kok J, Kuipers OP. LysM, a widely distributed protein motif for  
966 binding to (peptido)glycans. Mol Microbiol. 2008;68: 838–847. doi:10.1111/j.1365-  
967 2958.2008.06211.x  
968 59. Van den Ackerveken GF, Van Kan JA, Joosten MH, Muisers JM, Verbakel HM,  
969 De Wit PJ. Characterization of two putative pathogenicity genes of the fungal tomato  
970 pathogen *Cladosporium fulvum*. Mol Plant-Microbe Interact MPMI. 1993;6: 210–215.  
971 60. O’Gorman CM, Fuller HT, Dyer PS. Discovery of a sexual cycle in the  
972 opportunistic fungal pathogen *Aspergillus fumigatus*. Nature. 2009;457: 471–4.  
973 61. Hubka V, Nissen CV, Jensen RH, Arendrup MC, Cmokova A, Kubatova A, et al.  
974 Discovery of a sexual stage in *Trichophyton onychocola*, a presumed geophilic  
975 dermatophyte isolated from toenails of patients with a history of *T. rubrum*  
976 onychomycosis. Med Mycol. 2015;53: 798–809. doi:10.1093/mmy/myv044  
977 62. Sequeira H, Cabrita J, De Vroey C, Wuytack-Raes C. Contribution to our  
978 knowledge of *Trichophyton megninii*. J Med Vet Mycol Bi-Mon Publ Int Soc Hum Anim  
979 Mycol. 1991;29: 417–418.  
980 63. Lin X, Hull CM, Heitman J. Sexual reproduction between partners of the same  
981 mating type in *Cryptococcus neoformans*. Nature. 2005;434: 1017–1021.  
982 doi:10.1038/nature03448  
983 64. Desjardins CA, Giamberardino C, Sykes SM, Yu C-H, Tenor JL, Chen Y, et al.  
984 Population genomics and the evolution of virulence in the fungal pathogen  
985 *Cryptococcus neoformans*. Genome Res. 2017;27: 1207–1219.  
986 doi:10.1101/gr.218727.116  
987 65. Comas I, Coscolla M, Luo T, Borrell S, Holt KE, Kato-Maeda M, et al. Out-of-  
988 Africa migration and Neolithic coexpansion of *Mycobacterium tuberculosis* with modern  
989 humans. Nat Genet. 2013;45: 1176–1182. doi:10.1038/ng.2744  
990 66. Monot M, Honoré N, Garnier T, Araoz R, Coppée J-Y, Lacroix C, et al. On the  
991 origin of leprosy. Science. 2005;308: 1040–1042. doi:10.1126/science/1109759  
992 67. Whiston E, Taylor JW. Comparative phylogenomics of pathogenic and

- 993 nonpathogenic species. G3 Bethesda Md. 2015;6: 235–244.  
994 doi:10.1534/g3.115.022806
- 995 68. de Jonge R, van Esse HP, Kombrink A, Shinya T, Desaki Y, Bours R, et al.  
996 Conserved fungal LysM effector Ecp6 prevents chitin-triggered immunity in plants.  
997 Science. 2010;329: 953–5. doi:10.1126/science.1190859
- 998 69. Seidl-Seiboth V, Zach S, Frischmann A, Spadiut O, Dietzsch C, Herwig C, et al.  
999 Spore germination of *Trichoderma atroviride* is inhibited by its LysM protein TAL6.  
1000 FEBS J. 2013;280: 1226–1236. doi:10.1111/febs.12113
- 1001 70. Ma L, Chen Z, Huang DW, Kutty G, Ishihara M, Wang H, et al. Genome analysis  
1002 of three *Pneumocystis* species reveals adaptation mechanisms to life exclusively in  
1003 mammalian hosts. Nat Commun. 2016;7: 10740. doi:10.1038/ncomms10740
- 1004 71. Cissé OH, Pagni M, Hauser PM. De novo assembly of the *Pneumocystis jirovecii*  
1005 genome from a single bronchoalveolar lavage fluid specimen from a patient. mBio.  
1006 2012;4: e00428-00412. doi:10.1128/mBio.00428-12  
1007

Geographic origin:

- United Kingdom (7)
- China (5)
- Germany (5)
- Canada (5)
- Unknown (5)
- Finland (3)
- Brazil (1)
- India (1)
- Spain (1)
- Switzerland (1)
- Vietnam (1)
- Zaire (1)

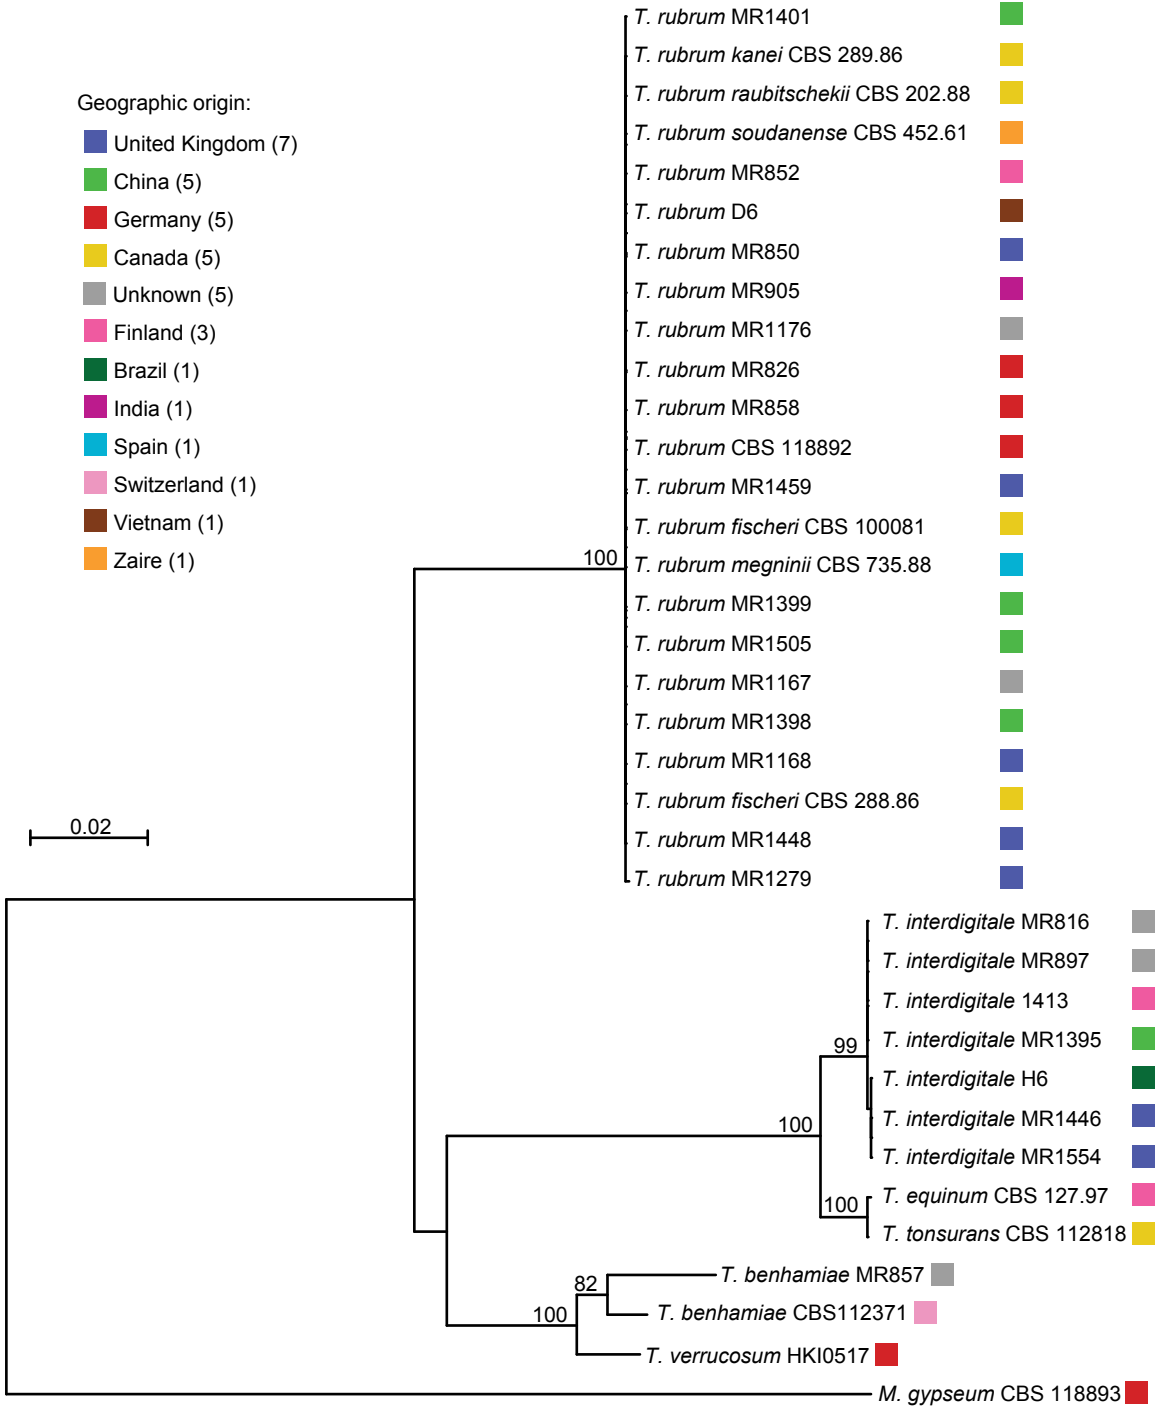

A.

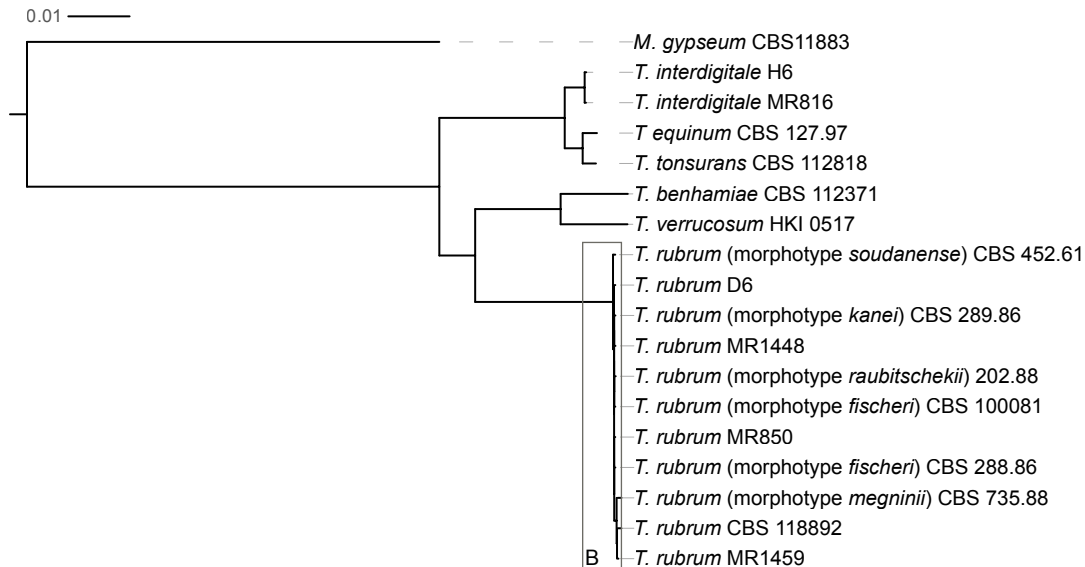

B.

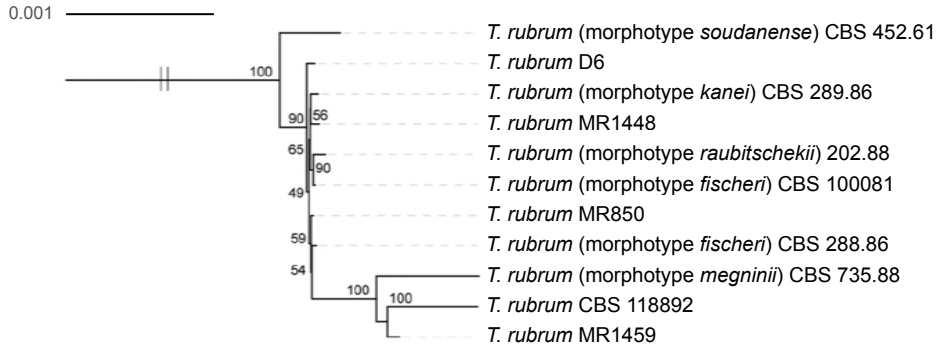



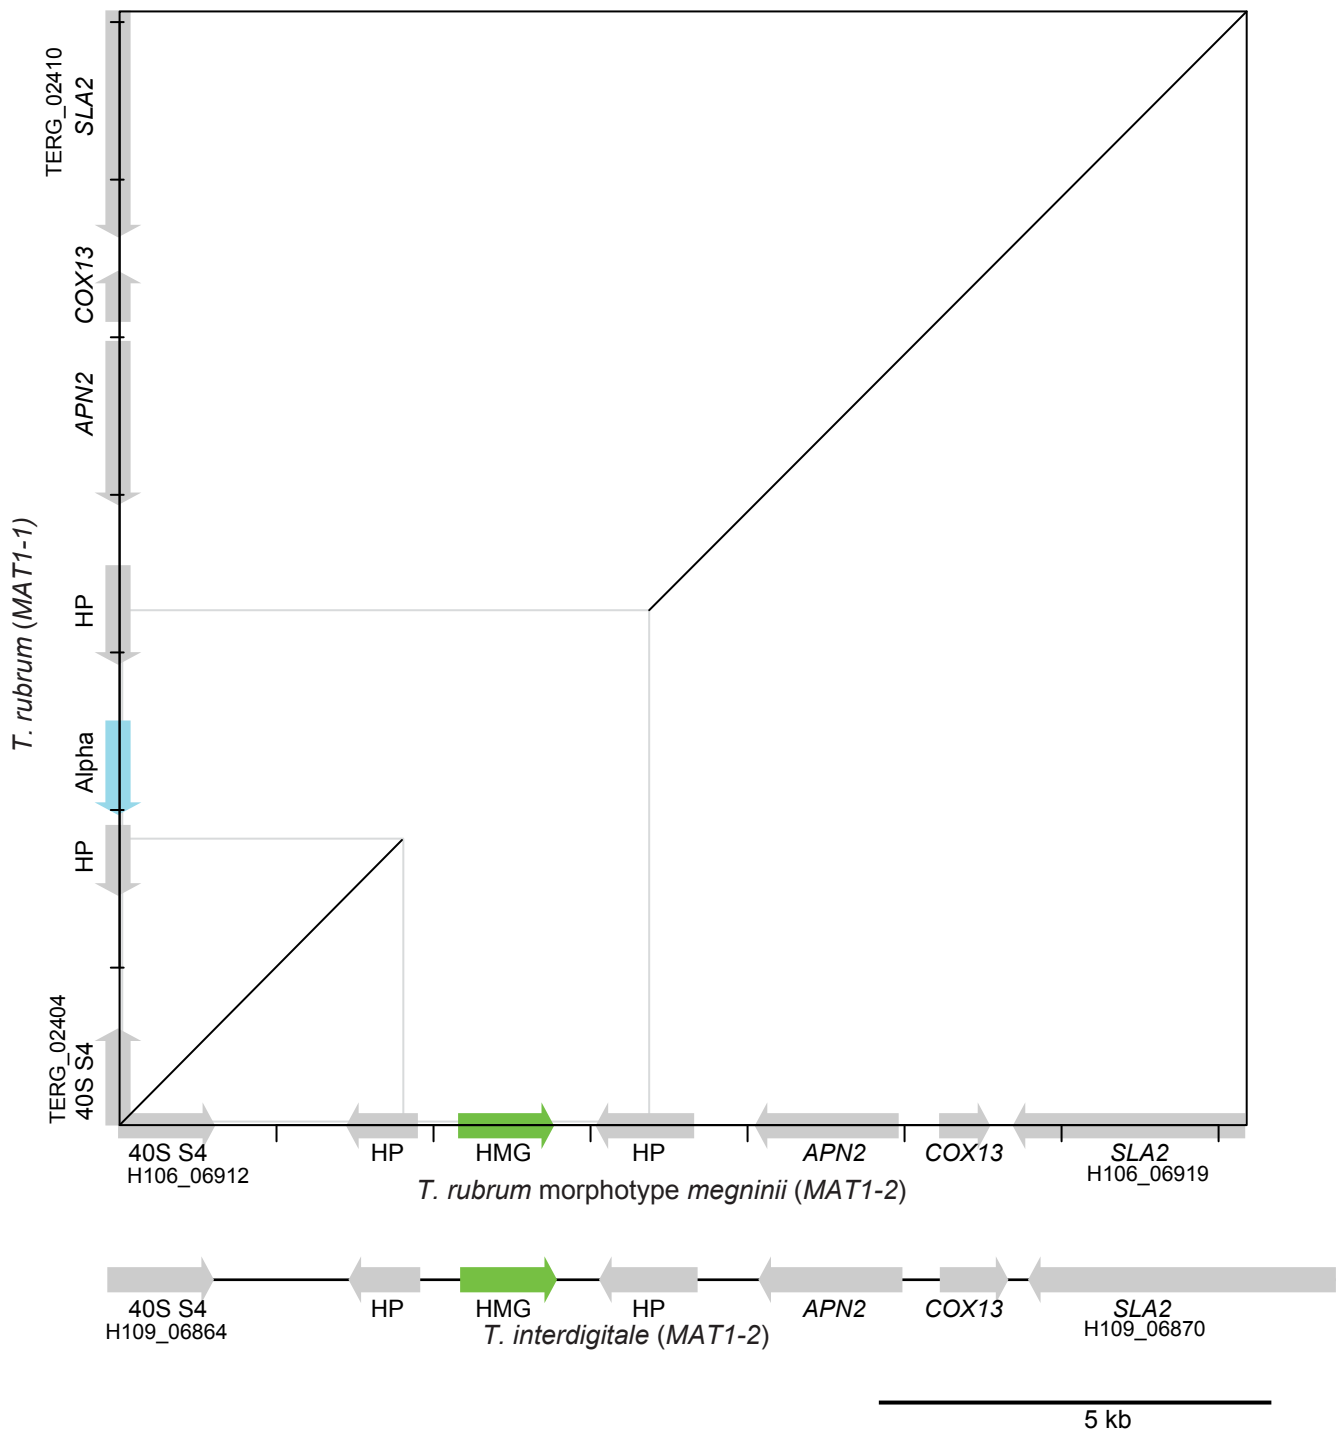



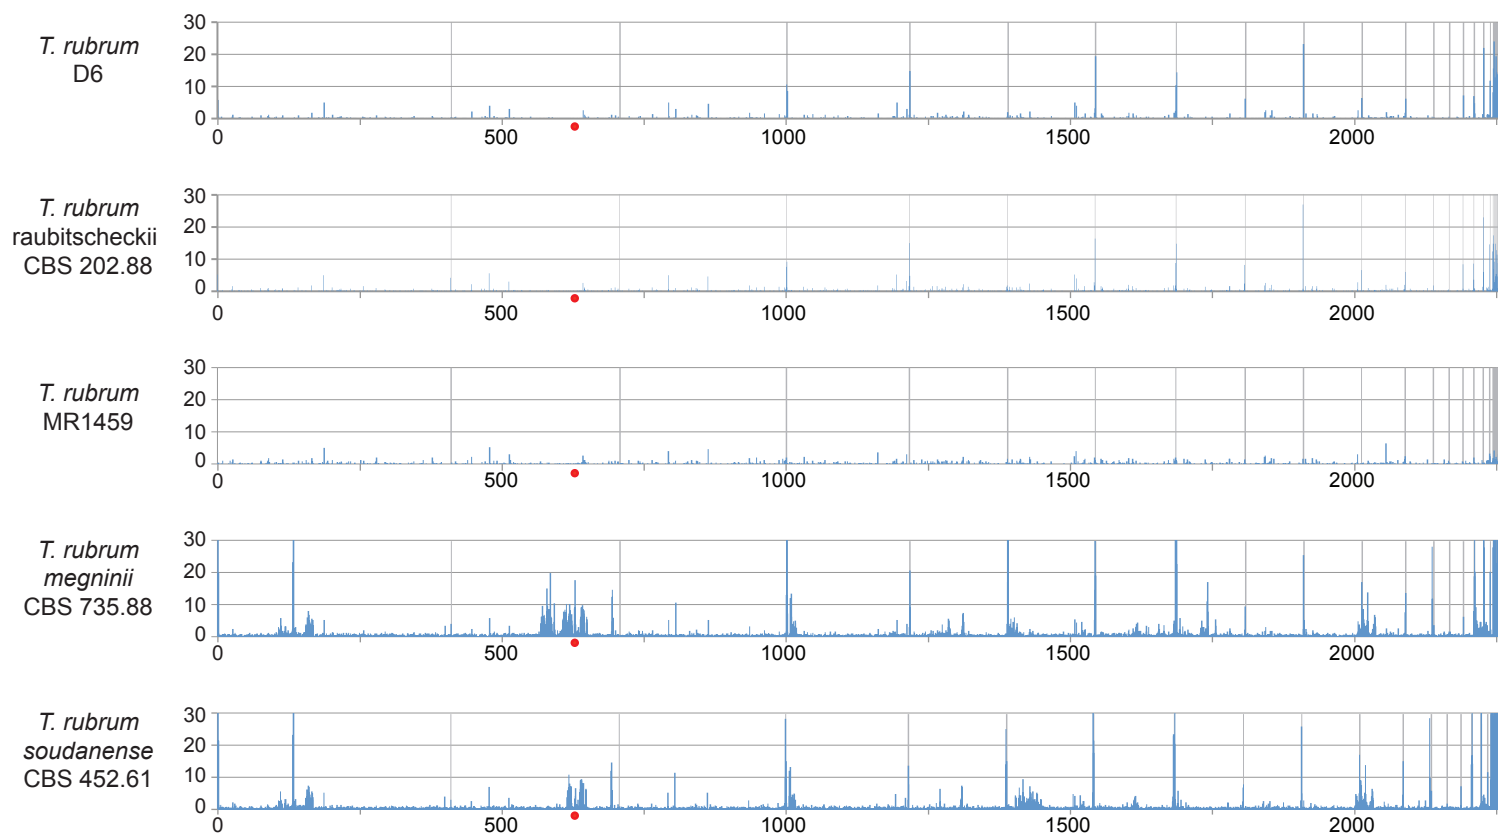

Source: https://www.biorxiv.org/content/10.1101/261743v1.full.pdf
